# Supplementary material
Source: Springer Nature journal article supplement (https://www.springermedizin.de/resource/supplementary/12865_2009_264_MOESM3_ESM.pdf/9427630)

**A.**

15 m      30 m      1 h      3 h      6 h      12 h      24 h

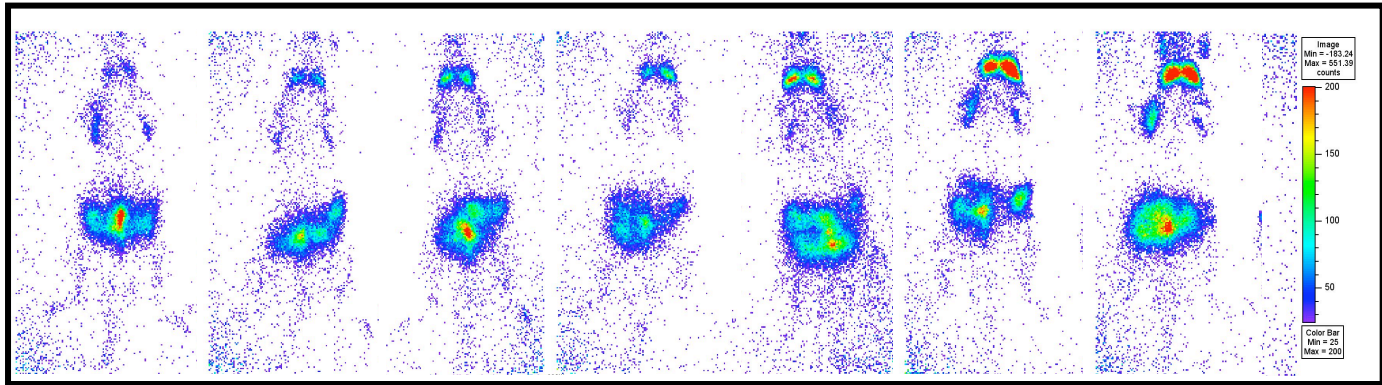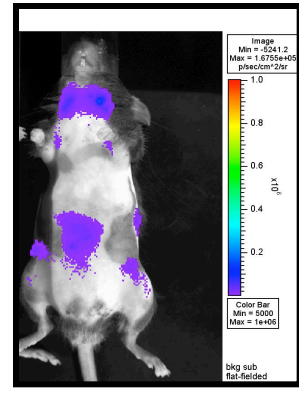**B.**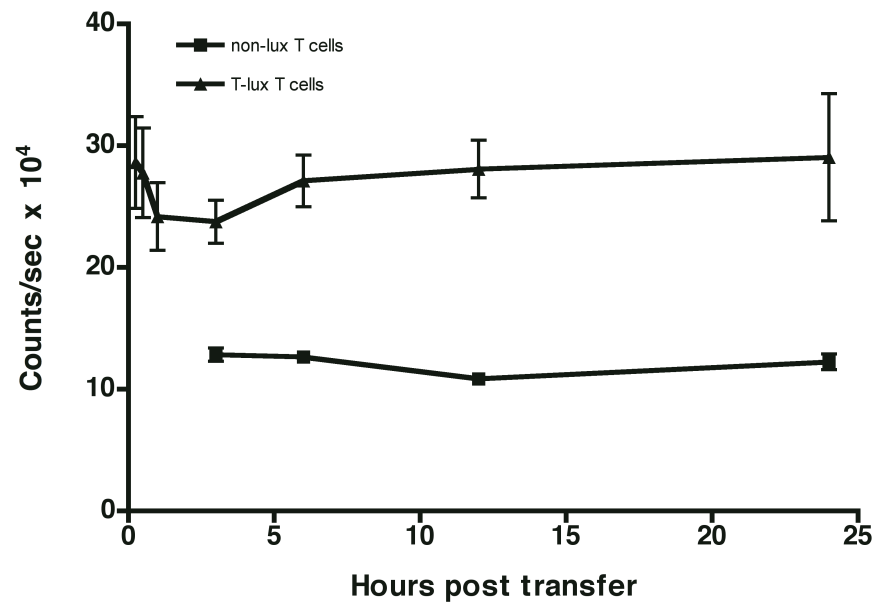

Supplement: MOESM3 [file 9427630]
